# Supplementary material for: Controlling the speciation and selectivity of Si3N4supported palladium nanostructures for catalysed acetylene selective hydrogenation
Source: Royal Society of Chemistry journal article supplement (doi:10.1039/d2qi01664h), 2022-01-01
Supplement: d2qi01664h1.pdf [file d2qi01664h1.pdf]

# **Controlling the speciation and selectivity of Si<sub>3</sub>N<sub>4</sub> supported palladium nanostructures for catalysed acetylene selective hydrogenation**

Rongrong Li<sup>1,†,\*</sup> Yuxue Yue,<sup>2,†</sup> Yongkun Li,<sup>2</sup> Xianlang Chen,<sup>1</sup> Renqin Chang,<sup>3</sup> Jiaxin Zhang,<sup>1</sup> Bo Zhao,<sup>1</sup> Xia Ying,<sup>1</sup> Zijian Wang,<sup>1</sup> Jia Zhao<sup>2,\*</sup>, Xiaonian Li

<sup>1</sup> Engineering Research Center of Recycling & Comprehensive Utilization of Pharmaceutical and Chemical Waste of Zhejiang Province, Taizhou University, Taizhou 318000, Zhejiang, China

<sup>2</sup> Institute of Industrial Catalysis, Zhejiang University of Technology, Hangzhou, 310014, China

<sup>3</sup> Research Center of Analysis Measurement, Zhejiang University of Technology, Hangzhou, 310014, China

E-mail: [jiazhao@zjut.edu.cn](mailto:jiazhao@zjut.edu.cn);

E-mail: [lrr@tzc.edu.cn](mailto:lrr@tzc.edu.cn)

<sup>†</sup> These authors contributed equally.

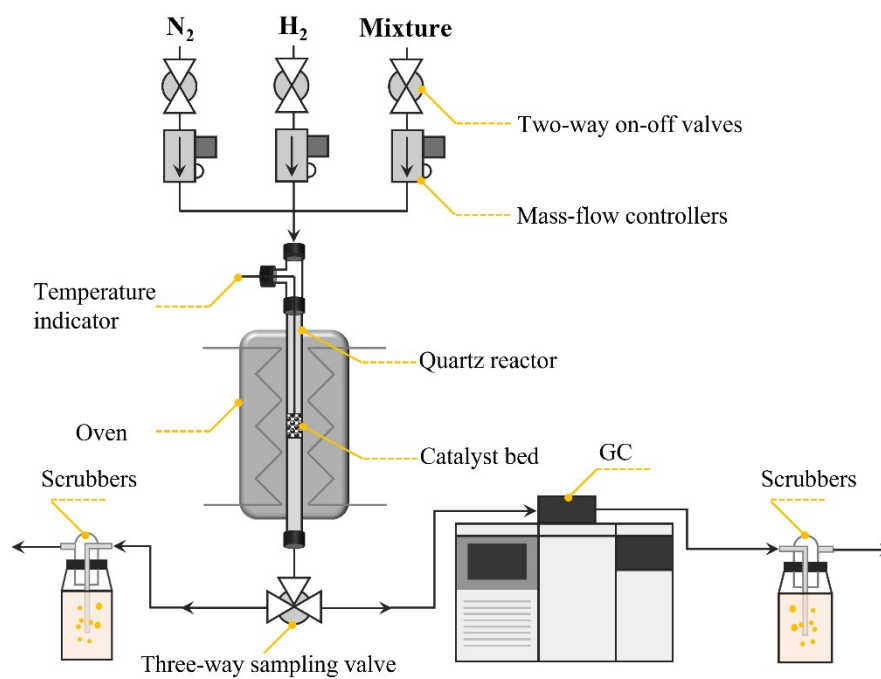

**Figure S1.** Scheme of the laboratory set-up used for selective hydrogenation of acetylene.

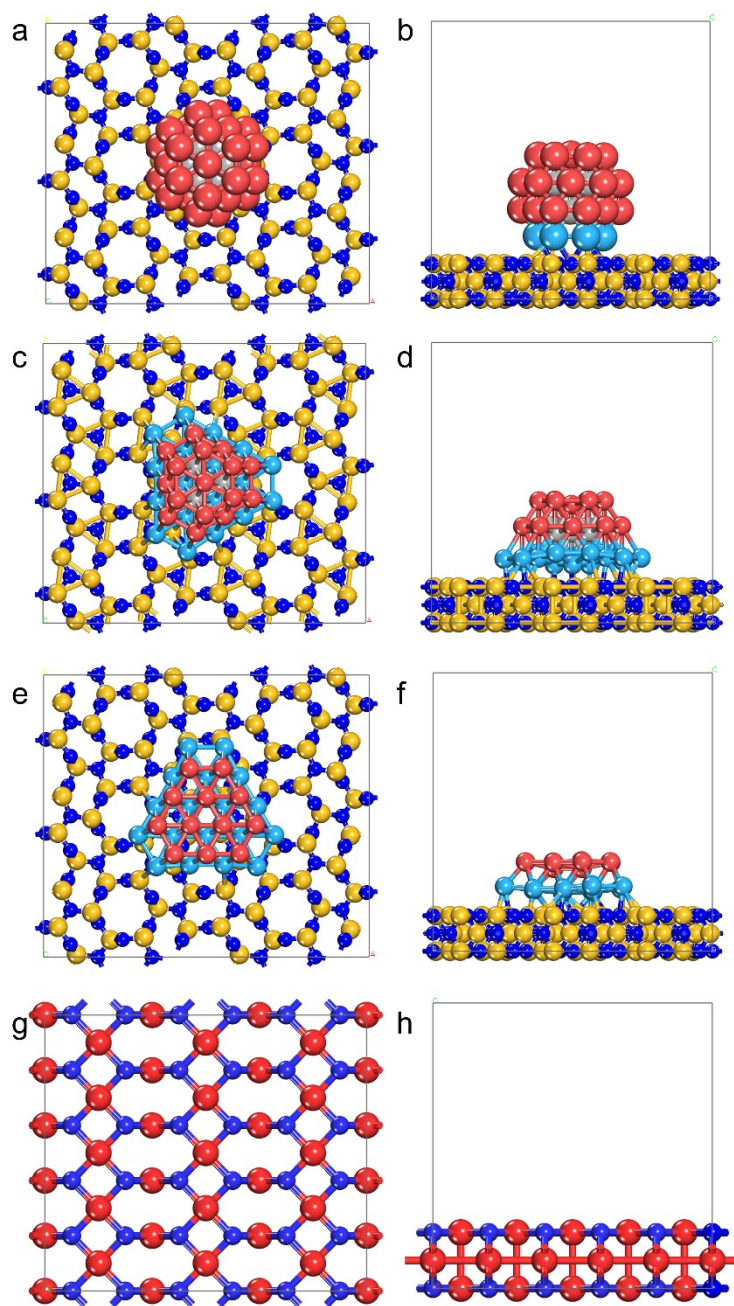

**Figure S2.** Top and side views of the computational model. (a) and (b) Pd NSs; (c) and (d) Pd NEs; (e) and (f) Pd NIs; (g) and (h) Pd NShs.

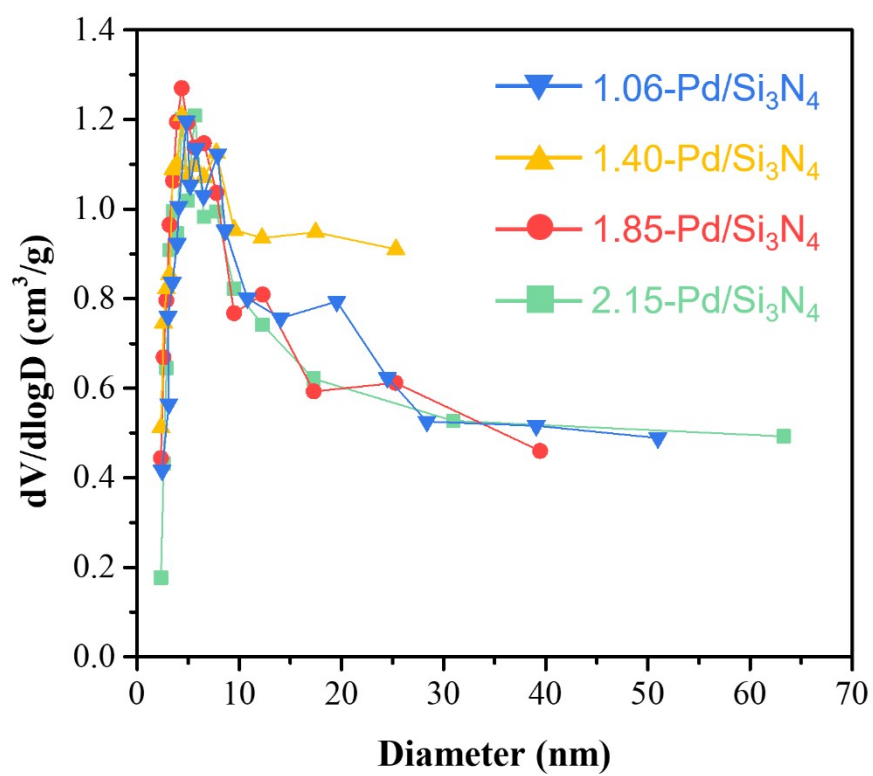

**Figure S3.** BJH pore size distribution.

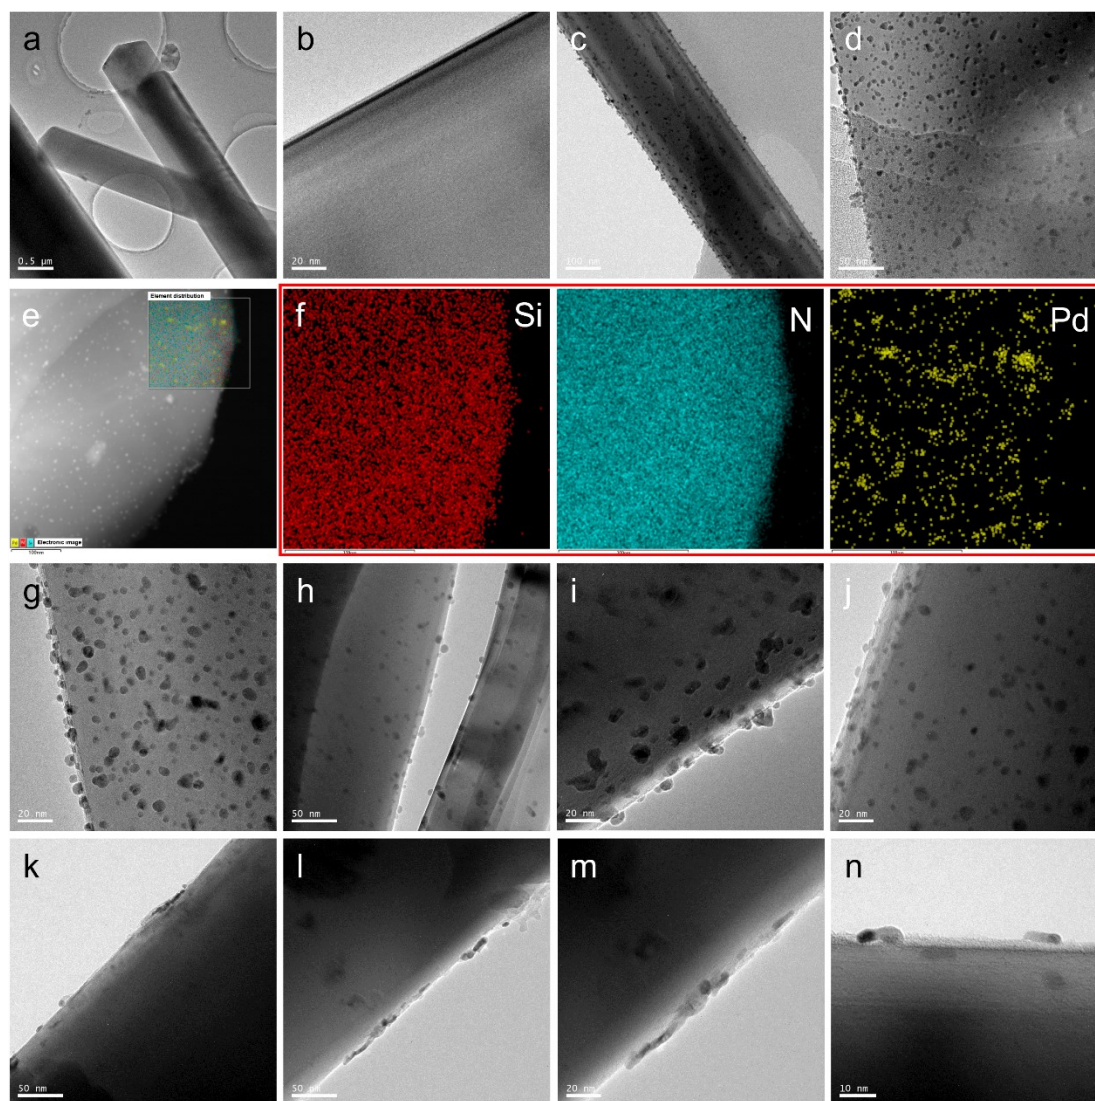

**Figure S4.** TEM images. (a) and (b) Si<sub>3</sub>N<sub>4</sub>; (c), (d) and (g) 2.15-Pd/Si<sub>3</sub>N<sub>4</sub>; (h) 1.85-Pd/Si<sub>3</sub>N<sub>4</sub>; (i) 1.40-Pd/Si<sub>3</sub>N<sub>4</sub>; (j) 1.06-Pd/Si<sub>3</sub>N<sub>4</sub>; (k-n) 2.15-Pd/Si<sub>3</sub>N<sub>4</sub> with thermal activation for 8h; (e)~(f) Elements mapping of 2.15-Pd-Si<sub>3</sub>N<sub>4</sub>.

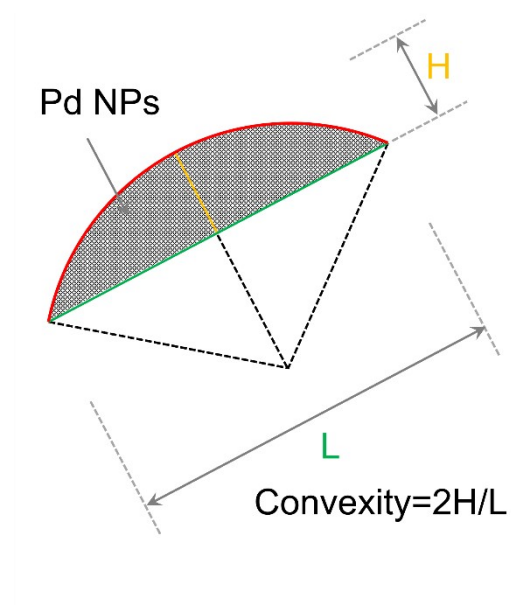

**Figure S5.** The formula for calculating the convexity.

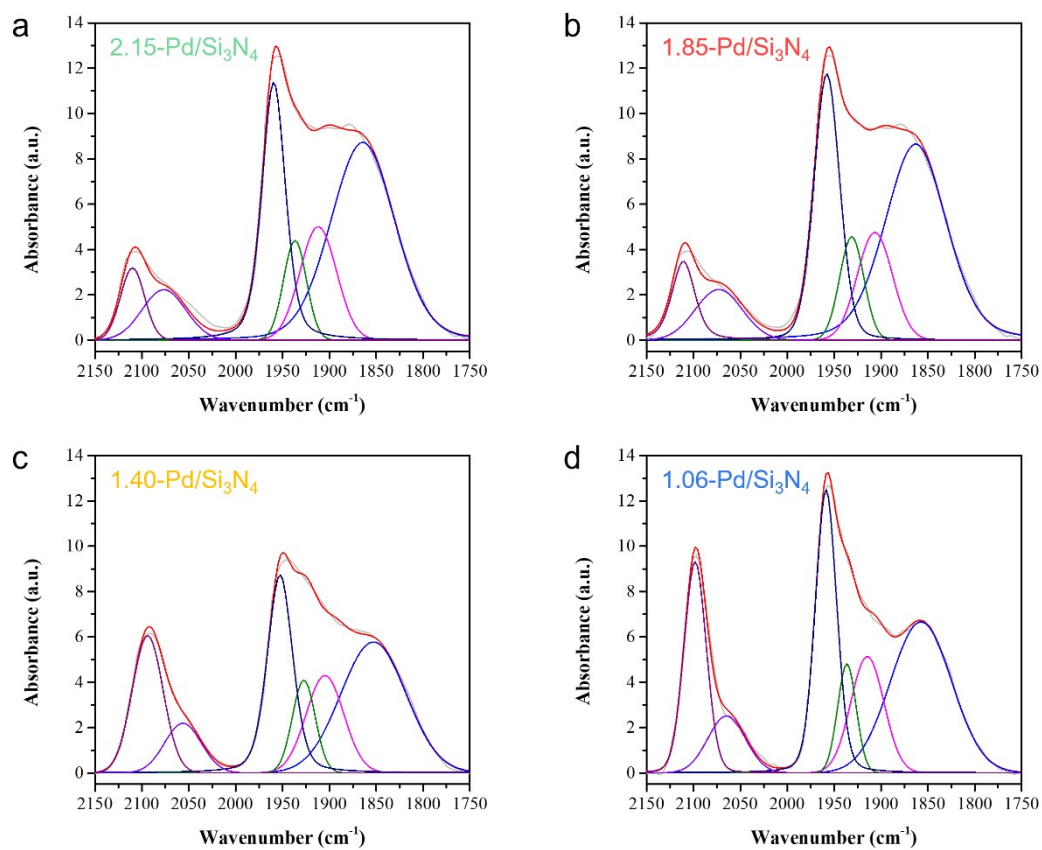

**Figure S6.** Fittings of the in situ DRIFTS of CO chemisorption using a Gaussian-Lorentzian function for estimation of the peak areas at 2100, 1960, and 1850  $\text{cm}^{-1}$ .



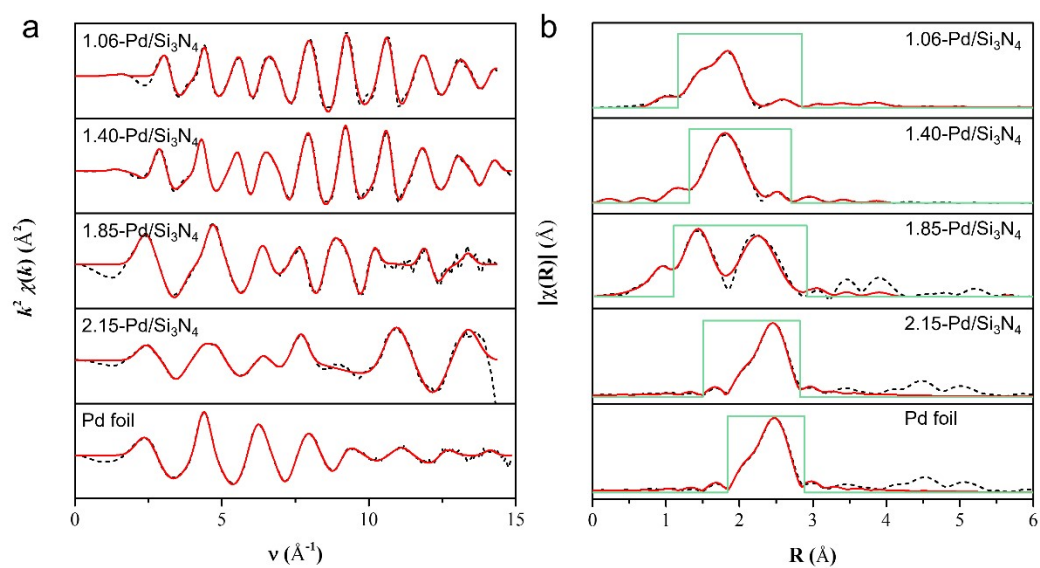

**Figure S7.** Experimental and fitted EXAFS spectra of Pd foil, 2.15-Pd/Si<sub>3</sub>N<sub>4</sub>, 1.85-Pd/Si<sub>3</sub>N<sub>4</sub>, 1.40-Pd/Si<sub>3</sub>N<sub>4</sub>, and 1.06-Pd/Si<sub>3</sub>N<sub>4</sub> samples at the Pd-K edge. (a) k-space; (b) R-space.



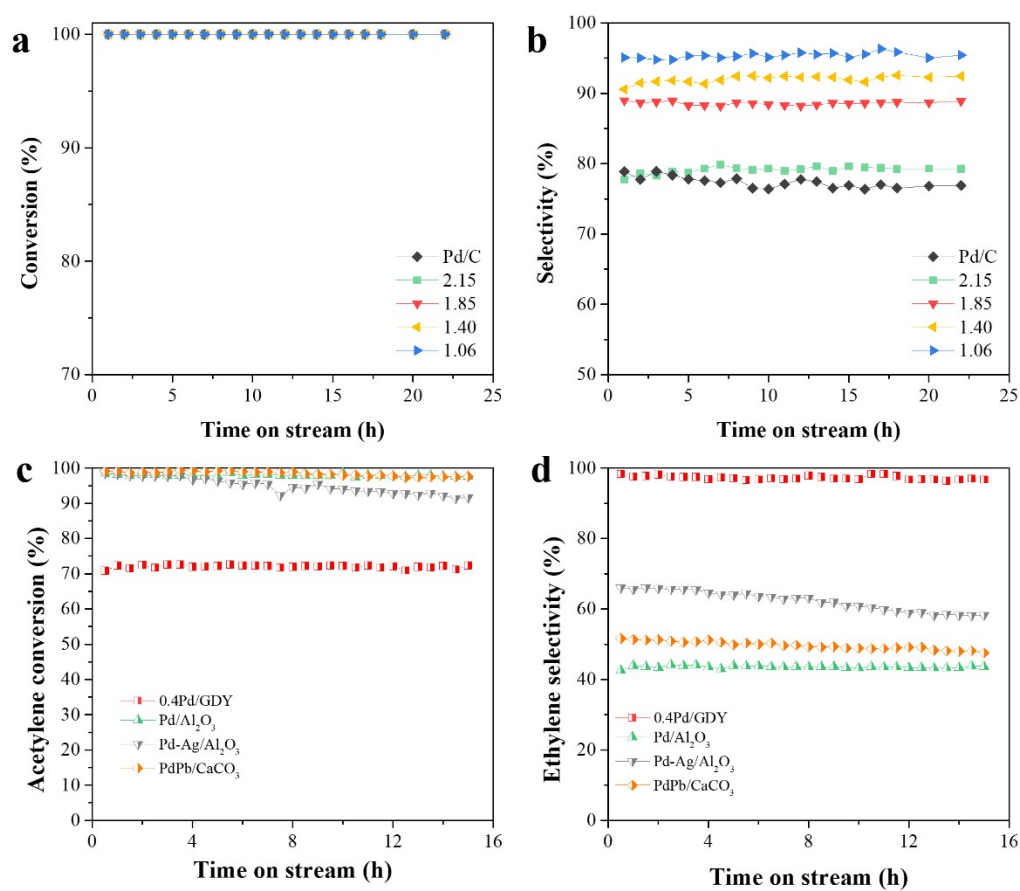

**Figure S8.** Long-term stability of mentioned Pd-based catalysts for acetylene selective hydrogenation. Reaction conditions:  $T = 433\text{ K}$ ,  $\text{GHSV} = 8000\text{ h}^{-1}$ .

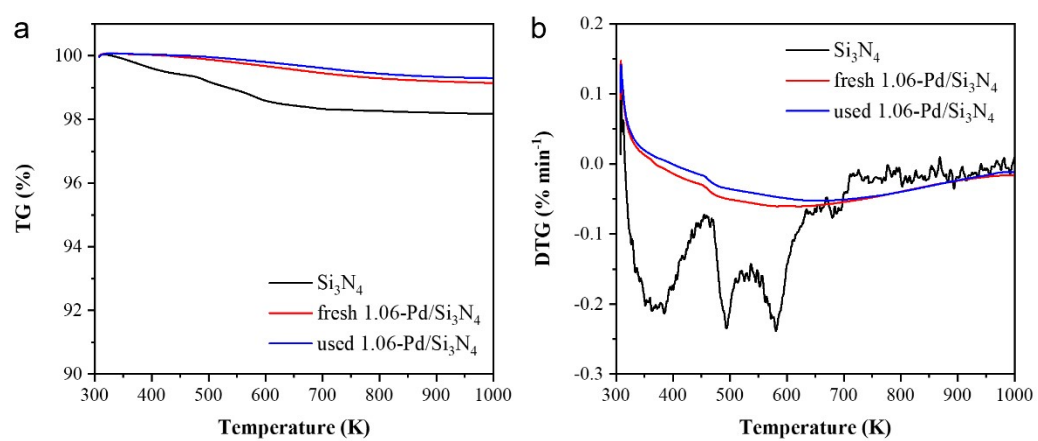

Figure S9. (a) TG and (b) DTG profiles of fresh and used 1.06-Pd/Si<sub>3</sub>N<sub>4</sub> catalysts along with the reference Si<sub>3</sub>N<sub>4</sub>.

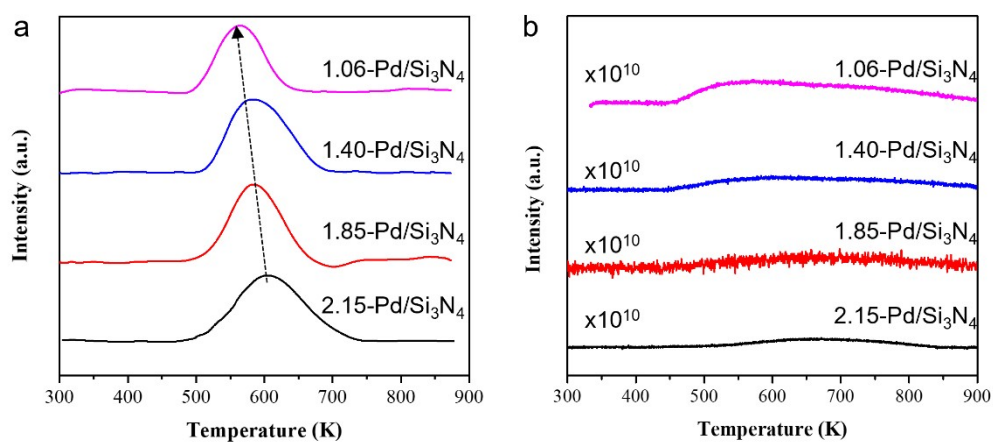

**Figure S10.** (a) CO<sub>2</sub>-TPD profiles and (b) NH<sub>3</sub>-TPD profiles of investigated Pd/Si<sub>3</sub>N<sub>4</sub> catalysts.

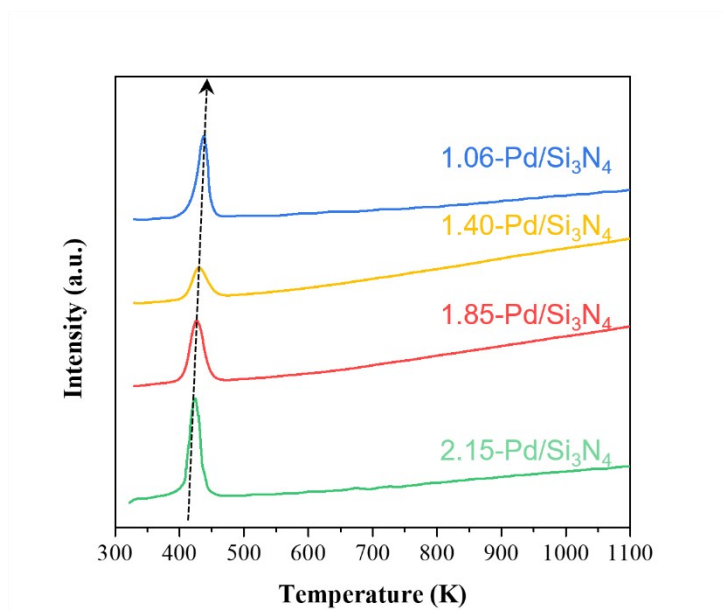

**Figure S11.** H<sub>2</sub>-TPR profiles of investigated Pd/Si<sub>3</sub>N<sub>4</sub> catalysts.

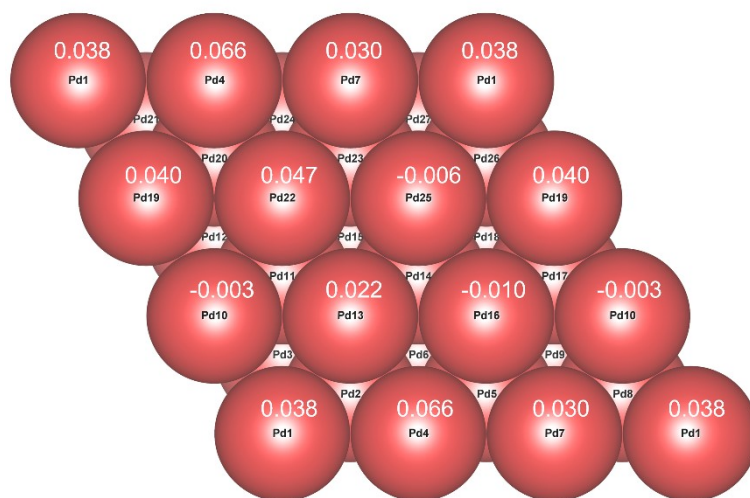

**Figure S12.** Bader charge on Pd over Pd (111) surface.

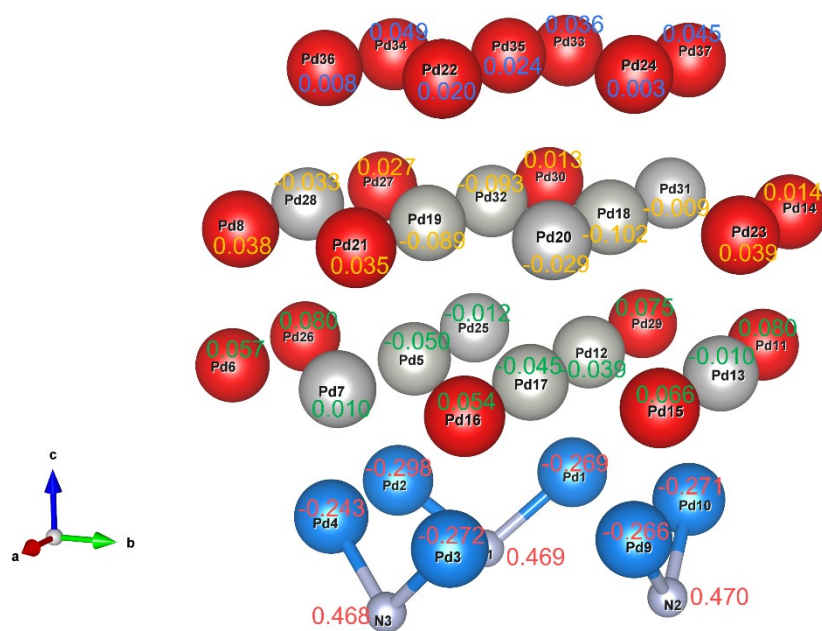

**Figure S13.** Bader charge on Pd over Pd NSs.

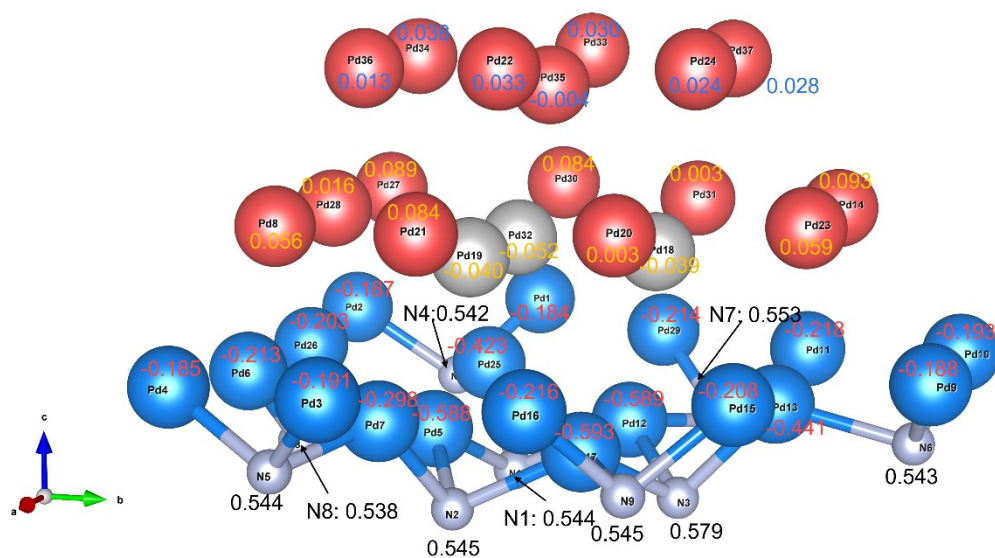

**Figure S14.** Bader charge on Pd over Pd NEs.



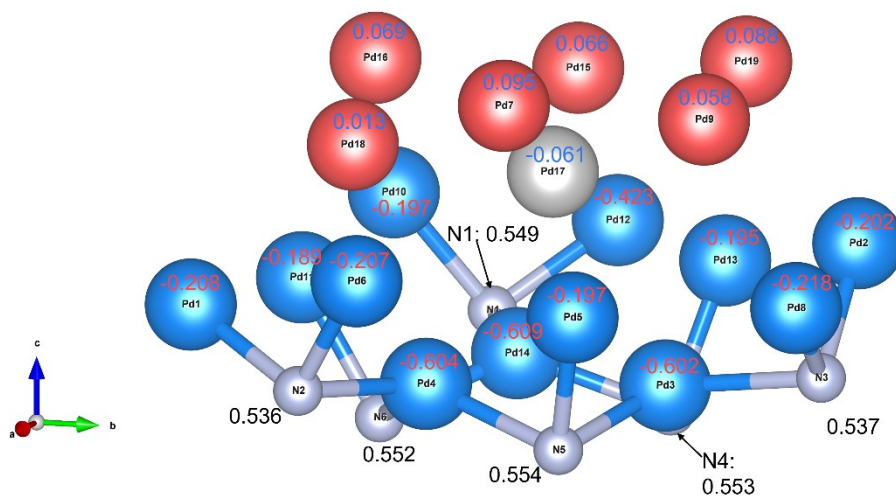

**Figure S15.** Bader charge on Pd over Pd NIs.

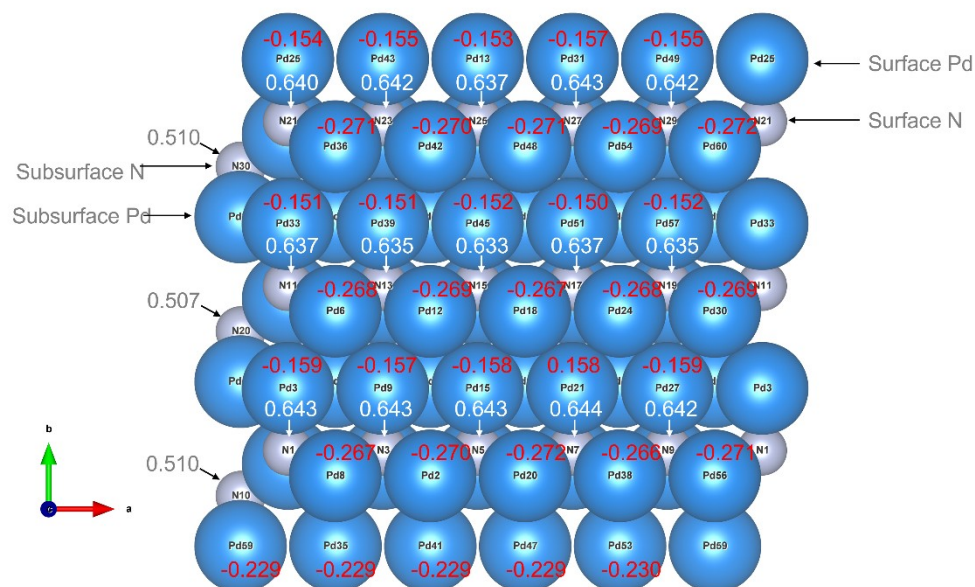

**Figure S16.** Bader charge on Pd over Pd NShs.

**Table S1.** The ratios of the IR band area of various CO species on Pd catalysts employed in the present study.

| Catalyst                               | Peak position | FWHM* | Area   | % Area | Species       | Ratio/% |
|----------------------------------------|---------------|-------|--------|--------|---------------|---------|
| 2.15-Pd/Si <sub>3</sub> N <sub>4</sub> | 1864.34       | 80.48 | 797.97 | 46.87  | hollow sites  | 59.55   |
|                                        | 1910.09       | 42.87 | 110.71 | 6.50   |               |         |
|                                        | 1937.16       | 28.11 | 105.11 | 6.17   |               |         |
|                                        | 1959.36       | 29.48 | 417.50 | 24.52  | bridge sites  | 24.52   |
|                                        | 2075.61       | 54.61 | 129.51 | 7.61   | corner sites  | 15.93   |
|                                        | 2108.74       | 29.79 | 141.69 | 8.32   |               |         |
| 1.85-Pd/Si <sub>3</sub> N <sub>4</sub> | 1862.95       | 77.29 | 745.63 | 43.85  | hollow sites  | 57.07   |
|                                        | 1908.85       | 40.47 | 100.39 | 5.90   |               |         |
|                                        | 1931.61       | 28.74 | 124.48 | 7.32   |               |         |
|                                        | 1957.77       | 32.27 | 410.46 | 24.14  | bridged sites | 24.14   |
|                                        | 2071.85       | 58.95 | 140.14 | 8.24   | corner sites  | 18.79   |
|                                        | 2106.64       | 34.34 | 179.40 | 10.55  |               |         |
| 1.40-Pd/Si <sub>3</sub> N <sub>4</sub> | 1857.60       | 76.97 | 544.29 | 35.41  | hollow sites  | 52.92   |
|                                        | 1914.43       | 41.16 | 146.02 | 9.50   |               |         |
|                                        | 1936.42       | 23.49 | 123.17 | 8.01   |               |         |
|                                        | 1958.57       | 26.69 | 381.58 | 24.82  | bridged sites | 24.82   |
|                                        | 2071.89       | 20.94 | 42.31  | 2.75   | corner sites  | 22.26   |
|                                        | 2096.81       | 29.08 | 299.88 | 19.51  |               |         |
| 1.06-Pd/Si <sub>3</sub> N <sub>4</sub> | 1852.39       | 77.29 | 502.98 | 36.56  | hollow sites  | 48.05   |
|                                        | 1899.01       | 42.67 | 106.36 | 7.73   |               |         |
|                                        | 1924.13       | 23.41 | 51.67  | 3.76   |               |         |
|                                        | 1951.20       | 34.66 | 355.85 | 25.87  | bridged sites | 25.87   |
|                                        | 2057.03       | 32.67 | 35.87  | 2.61   | corner sites  | 26.08   |
|                                        | 2090.44       | 41.43 | 322.89 | 23.47  |               |         |

FWHM: Full Width at Half Maximum.

**Table S2.** EXAFS parameters fitted for the samples.

| Samples | Shell | CN <sup>a</sup> | R (Å) <sup>b</sup> | $\sigma^2$ (Å <sup>2</sup> ) | R-factor <sup>c</sup> |
|---------|-------|-----------------|--------------------|------------------------------|-----------------------|
| Pd foil | Pd-Pd | 12.0            | 2.74               | 0.00534                      | 0.0019                |
| 2.15    | Pd-Pd | 3.9             | 2.73               | 0.00549                      | 0.0023                |
| 1.85    | Pd-Pd | 0.79            | 2.60               | 0.00656                      | 0.0278                |
|         | Pd-N  | 4.34            | 2.20               | 0.01958                      |                       |
| 1.40    | Pd-Pd | 5.97            | 2.33               | 0.0018                       | 0.0170                |
|         | Pd-N  |                 |                    |                              |                       |
| 1.06    | Pd-N  | 6.54            | 2.33               | 0.0010                       | 0.0180                |

<sup>a</sup> Coordination number (N)

<sup>b</sup> Atomic distance (R)

<sup>c</sup> Debye-Waller factor (R-factor)
